# Supplementary material for: Comprehensive Extraction and Chemical Characterization of Bioactive Compounds in Tepals of Crocus sativus L.
Source: MDPI journal article supplement (doi:10.3390/molecules28165976), 2023-08-09

# Comprehensive Extraction and Chemical Characterization of Bioactive Compounds in Tepals of *Crocus Sativus* L.

Fabrizio Ruggieri <sup>1</sup>, Maria Anna Maggi <sup>1</sup>, Michela Rossi <sup>1</sup> and Roberto Consonni <sup>2,\*</sup>

## *supplementary materials*

Table S1: Detailed chemical structures of the main secondary metabolites belonging to flavonoids and anthocyanins classes.

|                             |                                                                                      |
|-----------------------------|--------------------------------------------------------------------------------------|
| kaempferol                  | 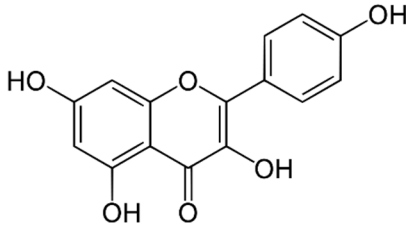   |
| kaempferol 3-O-β-sophorose  |   |
| kaempferol 3,4-di-O-glucose |  |
| kaempferol 3-O-rutinoside   |  |

|                                                  |                                                                                      |
|--------------------------------------------------|--------------------------------------------------------------------------------------|
| kaempferol 3,7-di- <i>O</i> -glucoside           | 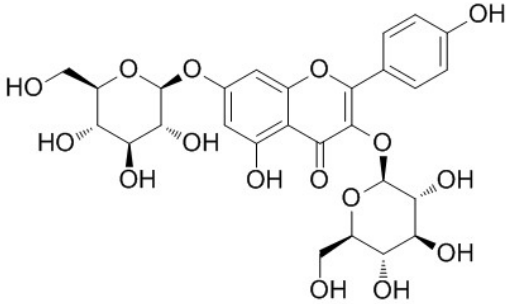   |
| kaempferol 7- <i>O</i> -glucoside                |    |
| kaempferol 3,7,4'-tri- <i>O</i> -glucoside       |   |
| kaempferol 3- <i>O</i> -glucoside                |  |
| kaempferol 3,7-di- <i>O</i> -β-D-glucopyranoside |  |
| kaempferol 7- <i>O</i> -β-D-glucopyranoside      |  |

|                                          |                                                                                      |
|------------------------------------------|--------------------------------------------------------------------------------------|
| kaempferol 3-O-sophoroside-7-O-glucoside | 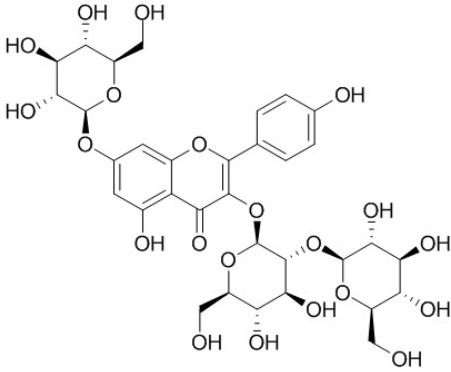   |
| quercetin                                |    |
| quercitrin                               |   |
| quercetin 3-O-sophoroside                |  |
| quercetin 3-O-β-D-glucopyranoside        |  |

|                                               |                                                                                      |
|-----------------------------------------------|--------------------------------------------------------------------------------------|
| <p>quercetin 3,4'-di-O-glucoside</p>          | 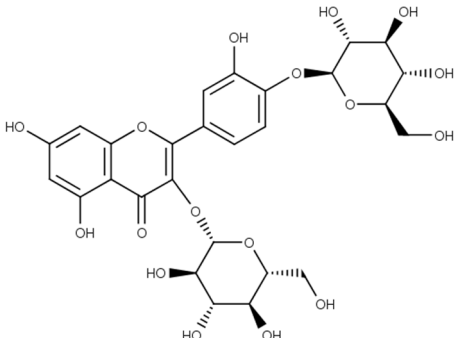   |
| <p>quercetin 3,7-di-O-β-D-glucopyranoside</p> |    |
| <p>rutin</p>                                  |  |
| <p>myricetin</p>                              |  |
| <p>naringenin</p>                             |  |

|                                      |                                                                                      |
|--------------------------------------|--------------------------------------------------------------------------------------|
| taxifolin                            | 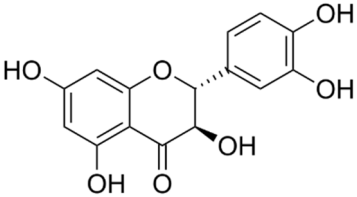   |
| tamarixetin                          |    |
| isorhamnetin                         |   |
| isorhamnetin 3-O-β-D-glucopyranoside |  |
| isorhamnetin 3,4'-di-O-glucoside     |  |

|                                           |                                                                                      |
|-------------------------------------------|--------------------------------------------------------------------------------------|
| isorhamnetin 3,7-di-O-β-D-glucopyranoside | 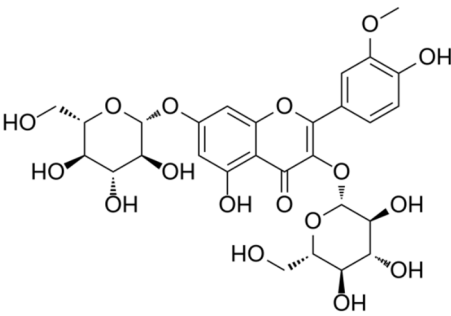   |
| delphinidin 3-O-glucoside                 |    |
| delphinidin 3,5-di-O-glucoside            |   |
| delphinidin 3,7-di-O-glucoside            |  |

|                                                                                                                |                                                                                      |
|----------------------------------------------------------------------------------------------------------------|--------------------------------------------------------------------------------------|
| <p>delphinidin 3-O-<math>\beta</math>-rutinosides</p>                                                          | 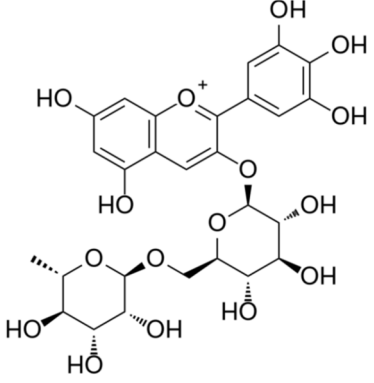   |
| <p>delphinidin 3-O-<math>\beta</math>-glucoside-5-O-(6-O-malonyl-<math>\beta</math>-glucoside)</p>             |    |
| <p>petunidin 3-O-(6-O-malonyl-<math>\beta</math>-glucoside)-7-O-(6-O-malonyl-<math>\beta</math>-glucoside)</p> |   |
| <p>malvidin 3-O-glucoside</p>                                                                                  |  |

|                                                                                                                                           |                                                                                      |
|-------------------------------------------------------------------------------------------------------------------------------------------|--------------------------------------------------------------------------------------|
| <p>malvidin 3,5-di-<i>O</i>-glucoside</p>                                                                                                 | 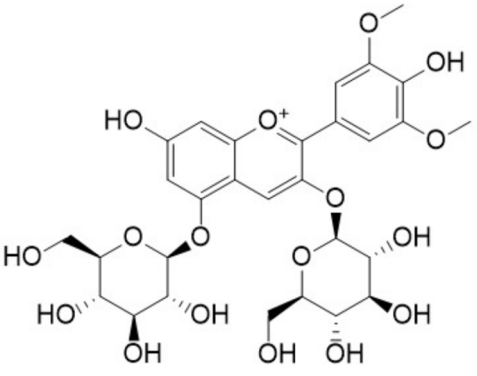   |
| <p>malvidin 3-<i>O</i>-(6-<i>O</i>-malonyl-<math>\beta</math>-glucoside)-7-<i>O</i>-(6-<i>O</i>-malonyl-<math>\beta</math>-glucoside)</p> |    |
| <p>petunidin 3-<i>O</i>-glucoside</p>                                                                                                     |  |
| <p>petunidin 3-<i>O</i>-<math>\beta</math>-rutinosides</p>                                                                                |  |



|                                                                |                                                                                      |
|----------------------------------------------------------------|--------------------------------------------------------------------------------------|
| <p>petunidin 3,7-di-<i>O</i>-<math>\beta</math>-glucosides</p> | 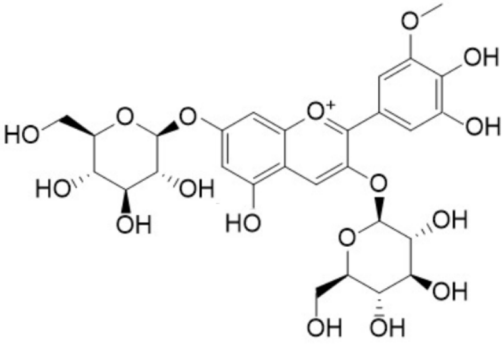   |
| <p>petunidin 3-<i>O</i>-(6''-<i>p</i>-coumaroyl-glucoside)</p> |    |
| <p>peonidin 3,5-<i>O</i>-diglucoside</p>                       |   |
| <p>peonidin 3,7-di-<i>O</i>-<math>\beta</math>-glucosides</p>  |  |
| <p>cyanidin</p>                                                |  |

|                                                  |                                                                                      |
|--------------------------------------------------|--------------------------------------------------------------------------------------|
| 3-( <i>R</i> )-3-β-D-glucopyranosyloxybutanolide | 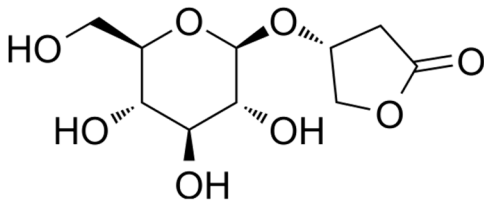   |
| 3-( <i>S</i> )-3-β-D-glucopyranosyloxybutanolide |    |
| ferulic acid                                     |    |
| cinnamic acid                                    |  |
| ellagic acid                                     |  |
| catechin                                         |  |

|               |                                                                                      |
|---------------|--------------------------------------------------------------------------------------|
| epicatechin   | 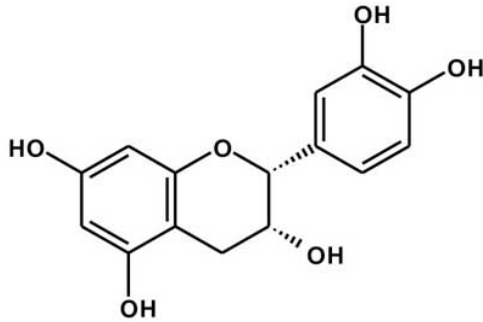   |
| vitamin C     |    |
| caftaric acid |   |
| apigenin      |  |
| luteolin      |  |
| fisetin       |  |

hesperitin

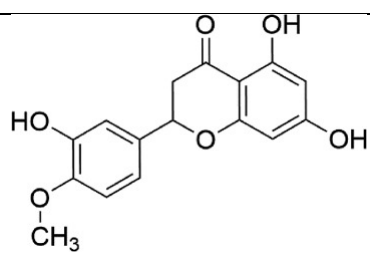

Supplement: s1 [file s1]
